# Supplementary material for: Whole-Exome Sequencing Identifies Homozygote Nonsense Variants in LMOD2 Gene Causing Infantile Dilated Cardiomyopathy
Source: MDPI journal article supplement (doi:10.3390/cells12111455), 2023-05-23
Supplement: s1 [file s1]

A

```

1 agttgtgac cagcctgcc cttgctccc tgctgtctt tgcgccttt gaatgcttg tocttcaag tocttctgg tctgacaaa cagggaocg gtctacottt ggctacogaa
121 gaggaactag taataacgaa tccatgaag aggatgaact cctgcctccc ctgtcagcgg aggatgtgaa ggagatagag agagagtgg aagacattga acctgacgc aaccttccg
241 tgggtctag gcaaaagag ctagacaga aaaccccaa agggacatt agagagagg cactgatgg ctattgggaa aaggagtccc aaaaactctt ggaagaggag aggtctggg
361 aatgtgaaa gtttgagaa gacaaagag aagtgaaga agacttatt tttactgaaa gtaacagtga gtttctgag gaagtgtata cagaggaga ggaaggaggag tccagaggg
481 aagagagaga aagacacagt gacgaagag aaagaacat tgaactgca aaaggatta atggaactgt aaattatgat agtgtcaat ctgacaactc taagccaaag atatttaaa
601 gtcaaataga gaacataat ttgaccaat gacgaatgg gaggaacaca gagtcccaa ctgccattca cctttgtga aatctacag tgattgaga ogotttgag agatttaaa
721 goaatgaccc tgacacaca gaagtaatt tgaacaacat tgaacaacat acaacacaga cootttaoog ottttgtgaa goottoaagg acaaacctgt ggtgaagaog ttoagtctg
841 caaacagaga tgcgaagag agtgaagaa tggcaattg agagatgct aagtaoatg agcaatoc caaogtaac gtogagtcaa acttcaaac ggaagagggt atcttgaca
961 toatgagag toctocagac aaacaggtg toaogagot goitttcoat aacogagag cactatgg cagcaagtg gaaatggaga ttgtaagot ggtgaaggag aacogagag
1081 tctgaggtt gggataoat ttgtaacoo caggacaag aatgacatg aogagattt tgaacaaaa tatgataaa cagaggcaaa aagtttga ggaagaaaa cagcaggag
1201 gatcagatg aggacacat cttagacca aagctgcca aagaggaca ctagctctt cacttatgt atctccagg cactacact gttcatccc aaactccc aaaaagtc
1321 agactgtgag gagcgtctt ctgtctctg tggcacaac tootctoot oooctooto ootctooto ootctoott toocaaaggo tgaacacac tootctoot oooctooto
1441 cactccaga gaaaagoto tttaocaga acattgaga agtctoaia caaogggga gtgccaagc ggtcttaaa atggacaa aaaaagaaa agggaaaag gtccagaa
1561 agcaaacag tatttaaa attctctag gtaagtgaa gagaagaaa ttgaagacag ttccagact tctacccc agagatcago toatgagaat ctatggaag
1681 caattoggg aagcagata aaacagotaa agoggtgga agttccaga gccctgcat aaaaacatg tocttgaag aggatgcaga actgtcagt ggtattcat gaaatgatt
1801 gtgagatgt tcaaaatc ctcttcaat tcaaatgat cctgacttt aaaaatc toacccat attcaaga gaacttaag aaacatcag catgtttct ctgtaaat
1921 gaaataaat tcttttcta ttgtgtgga ttgtatgg caagaagag ttaattaaa gatgtcttc ctatctgtg atgtgtgtt aactccaggt tgaatgagt tcatgaatg
2041 tctgttatt ttgttaatt caataaagt ggttgaggt ttttccct tttttaag caaacata ttttctgt acttgatac tctgcagt tttgtatc tggataatg
2161 tgtattgag tttttccct ttttttaaa agcaaacat atattttct gtgagtaat acatctgca ggtgtgat taacattact ggcattaaa aaaaatatt acattctac
2281 ccaaaaa

```

B

```

1 mstfgyrrgl skyesidede llaslsaeel kelerleedi epdrnlpvgi rqksltektp
61 tgtfsrealm aywekesqkl lekerlgecg kvaedkeese eeliftesns evseevtyee
121 eeeeeqeeeee eedsdeeert ietakgingt vnydsvnsdn skpkifksqi eninltngsn
181 grntespaai hpcgnptvie daldkiksnd pdttevnlnn ienittqtlt rfaeakdnt
241 vvktfslant haddsaamai aemlkvnehi tnvvesnfi tgkgilaimr alghntvlte
301 lrfhnqrhim gsqvemeivk llkenttllr lgyhfelpgp rmsmtsiltr nmdkqrqkl
361 qeqkqegyd ggpnlrtkvw qrgtpssspy vsprhspwss pklpkkvqtv rsrplspvat
421 pppppppppp pppssqrlp ppppppplp ekklitrnia evikqgesaq ralqngqkkk
481 kgkvkqpn silkeiknsl rsvqekkmed ssrpstpqrs ahenlmeair gssikqlkrv
541 evpealr

```

**Figure S1. LMOD2 Transcript and Amino Acid Sequences. A.** LMOD2 transcript sequence. Opening (atg) and stop (taa) codons as well as splicing boundaries are underscored. Affected codons in the published reports are bolded in black. **B.** LMOD2 amino acid sequence and structural domains. Colored amino acids are those of the LMOD2 isoform 1~547 corresponding to the boxes on the domain diagram shown in **Figure 5. C.** with corresponding colors. The underscored amino acids are at the splicing boundaries. The bolded amino acids are the first affected amino acid based directly or indirectly on the sequencing results of reported cases.

**Table S1.** Biochemical testing and infection work up for infantile heart failure.

| Differential Etiology    | Test Parameters                                                                                               | Test Interpretation                          |
|--------------------------|---------------------------------------------------------------------------------------------------------------|----------------------------------------------|
| Hypothyroidism           | TSH<br>Free T4                                                                                                | Negative                                     |
| Immune hemolytic anemia  | Isotiter antibody screen                                                                                      | Negative                                     |
| Congenital syphilis      | RPR                                                                                                           | Negative                                     |
| SARS-CoV-19 infection    | PCR/TMA                                                                                                       | Negative                                     |
| Viral hepatitis          | HAV, HBV, HCV-PCR                                                                                             | Negative                                     |
| HIV infection            | HIV-1 and HIV-2 Ag/Ab screen 4 <sup>th</sup> generation                                                       | Negative                                     |
| HSV Infection            | HSV-1 and HSV-2 DNA (PCR)                                                                                     | Negative                                     |
| EBV infection            | EBV DNA (PCR)                                                                                                 | Negative                                     |
| Rapid Respiratory Panel  | Adenovirus, influenza A/B, human metapneumovirus, human rhinovirus/enterovirus, seasonal coronavirus, RSV A/B | Negative                                     |
| CMV Infection            | CMV DNA (PCR)                                                                                                 | Negative                                     |
| Para Influenza Infection | Para influenza Type 1,2,3,4 DNA (PCR)                                                                         | Positive (Type 4)<br>Negative (Type 1, 2, 3) |

PCR, polymerase chain reaction; TMA, transcription-mediated amplification; TSH, thyroid-stimulating hormone; HIV, human immunodeficiency virus; HSV, herpes simplex virus; EBV, Epstein-Barr virus; CMV, cytomegalic virus.

| Table S2. Comprehensive Cardiomyopathy Panel*                                                                                                                           |       |        |         |
|-------------------------------------------------------------------------------------------------------------------------------------------------------------------------|-------|--------|---------|
| ABCC9                                                                                                                                                                   | DSG2  | MAP2K1 | RIT1    |
| ACADVL                                                                                                                                                                  | DSP   | MAP2K2 | RYR2    |
| ACTC1                                                                                                                                                                   | ELAC2 | MRAS   | SCN5A   |
| ACTN2                                                                                                                                                                   | EMD   | MTO1   | SDHA    |
| AGL                                                                                                                                                                     | EYA4  | MYBPC3 | SGCD    |
| ALMS1                                                                                                                                                                   | FHL1  | MYH7   | SHOC2   |
| ALPK3                                                                                                                                                                   | FKRP  | MYL2   | SLC22A5 |
| BAG3                                                                                                                                                                    | FKTN  | MYL3   | SOS1    |
| BRAF                                                                                                                                                                    | FLNC  | MYL4   | SOS2    |
| CACNA1C                                                                                                                                                                 | GAA   | MYLK3  | SPRED1  |
| CACNA1D                                                                                                                                                                 | GATA4 | NF1    | TAZ     |
| CALM1                                                                                                                                                                   | GATA5 | NKX2-5 | TBX20   |
| CALM2                                                                                                                                                                   | GJA5  | NRAS   | TCAP    |
| CALM3                                                                                                                                                                   | GLA   | PCCA   | TMEM43  |
| CASQ2                                                                                                                                                                   | HCN4  | PCCB   | TMEM70  |
| CBL                                                                                                                                                                     | HRAS  | PKP2   | TNNC1   |
| CDH2                                                                                                                                                                    | JUP   | PLN    | TNNI3   |
| CPT2                                                                                                                                                                    | KCNE1 | PPA2   | TNNI3K  |
| CRYAB                                                                                                                                                                   | KCNH2 | PPCS   | TNNT2   |
| CSRP3                                                                                                                                                                   | KCNJ2 | PPP1CB | TPM1    |
| DES                                                                                                                                                                     | KCNQ1 | PRKAG2 | TRDN    |
| DMD                                                                                                                                                                     | KRAS  | PTPN11 | TRPM4   |
| DNAJC19                                                                                                                                                                 | LAMP2 | RAF1   | TTN     |
| DOLK                                                                                                                                                                    | LMNA  | RASA1  | TTR     |
| DSC2                                                                                                                                                                    | LZTR1 | RBM20  | VCL     |
| (*) source: <a href="https://www.invitae.com/en/providers/test-catalog/test-02101">https://www.invitae.com/en/providers/test-catalog/test-02101</a> , accessed 20220626 |       |        |         |

| Table S3. Comprehensive Glycogen Storage Disease Panel*                                                                                                                 |         |
|-------------------------------------------------------------------------------------------------------------------------------------------------------------------------|---------|
| AGL                                                                                                                                                                     | PFKM    |
| ALDOA                                                                                                                                                                   | PGAM2   |
| ENO3                                                                                                                                                                    | PGK1    |
| FBP1                                                                                                                                                                    | PGM1    |
| G6PC                                                                                                                                                                    | PHKA1   |
| GAA                                                                                                                                                                     | PHKA2   |
| GBE1                                                                                                                                                                    | PHKB    |
| GYG1                                                                                                                                                                    | PHKG2   |
| GYS1                                                                                                                                                                    | POLG    |
| GYS2                                                                                                                                                                    | PYGL    |
| LAMP2                                                                                                                                                                   | PYGM    |
| LDHA                                                                                                                                                                    | RBCK1   |
| LPIN1                                                                                                                                                                   | SLC2A2  |
| PCK1                                                                                                                                                                    | SLC37A4 |
| PCK2                                                                                                                                                                    |         |
| (*) source: <a href="https://www.invitae.com/en/providers/test-catalog/test-06156">https://www.invitae.com/en/providers/test-catalog/test-06156</a> , accessed 20220626 |         |
